# Supplementary material for: The Effect of Cholesterol Content on the Adjuvant Activity of Nucleic-Acid-Free Lipid Nanoparticles
Source: MDPI journal article supplement (doi:10.3390/pharmaceutics16020181), 2024-01-26
Supplement: s1 [file s1]

# Supplementary Materials

*Pharmaceutics*

## Title:

**The Effect of Cholesterol Content on the Adjuvant Activity of Nucleic-Acid-Free Lipid Nanoparticles**

## Authors:

Jessica Anindita<sup>1,2,†</sup>, Hiroki Tanaka<sup>1,3,\*,†</sup>, Takuma Yamakawa<sup>2</sup>, Yuka Sato<sup>2</sup>, Chika Matsumoto<sup>1</sup>, Kota Ishizaki<sup>2</sup>, Taiji Oyama<sup>4</sup>, Satoko Suzuki<sup>5</sup>, Keisuke Ueda<sup>6</sup>, Kenjiro Higashi<sup>6</sup>, Kunikazu Moribe<sup>6</sup>, Kasumi Sasaki<sup>7</sup>, Yumika Ogura<sup>7</sup>, Etsuo Yonemochi<sup>7</sup>, Yu Sakurai<sup>1</sup>, Hiroto Hatakeyama<sup>2</sup>, and Hidetaka Akita<sup>1,3,\*</sup>

## Affiliations

**Jessica Anindita** 1,2,†, **Hiroki Tanaka** 1,3,\*,†, **Takuma Yamakawa** 2, **Yuka Sato** 2, **Chika Matsumoto** 1, **Kota Ishizaki** 2, **Taiji Oyama** 4, **Satoko Suzuki** 5, **Keisuke Ueda** 6, **Kenjiro Higashi** 6, **Kunikazu Moribe** 6, **Kasumi Sasaki** 7, **Yumika Ogura** 7, **Etsuo Yonemochi** 7, **Yu Sakurai** 1, **Hiroto Hatakeyama** 2 and **Hidetaka Akita** 1,3,\*

<sup>1</sup> Laboratory of DDS Design and Drug Disposition, Graduate School of Pharmaceutical Sciences, Tohoku University, 6-3 Aoba Aramaki, Aoba-ku, Sendai City 980-8578, Miyagi, Japan

<sup>2</sup> Laboratory of DDS Design and Drug Disposition, Graduate School of Pharmaceutical Sciences, Chiba University, 1-8-1 Inohana, Chuo-ku, Chiba City 260-0856, Chiba, Japan

<sup>3</sup> Center for Advanced Modalities and DDS, Osaka University, Suita 565-0871, Osaka, Japan

<sup>4</sup> Sales Division, JASCO Corporation, 2967-5 Ishikawa, Hachioji City 192-8537, Tokyo, Japan; taiji.oyama@jasco.co.jp

<sup>5</sup> Applicative Solution Lab Division, JASCO Corporation, 2967-5 Ishikawa, Hachioji City 192-8537, Tokyo, Japan

<sup>6</sup> Laboratory of Pharmaceutical Technology, Graduate School of Pharmaceutical Sciences, Chiba University, 1-8-1 Inohana, Chuo-ku, Chiba City 260-0856, Chiba, Japan; keisuke@chiba-u.jp (K.U.)

<sup>7</sup> Department of Physical Chemistry, School of Pharmacy and Pharmaceutical Sciences, Hoshi University, 2-4-41 Ebara, Shinagawa-ku, Shinagawa City 142-8501, Tokyo, Japan

\* Correspondence: hiroki.tanaka.e1@tohoku.ac.jp (H.T.); hidetaka.akita.a4@tohoku.ac.jp (H.A.);

Tel.: +81-22-795-6831 (H.T. & H.A.)

† These authors contributed equally to this work.

## **Contents**

**S1. Detailed list of materials used in the study.**

**S2. Methods for supplementary figures**

**S2-1. Circular dichroism measurement**

**S2-2. Chemokine/cytokine measurement**

**S3. Supplementary figures**

**Figure S1. Correlation of lipid content and antibody production**

**Figure S2. Antibody production after separate administration of LNPs and antigens**

**Figure S3. Additional images of particle morphology observed using Cryo-TEM**

**Figure S4. The SAXS profile of Liposomes\_A-D**

**Figure S5. Circular dichroism (CD) spectra**

**Figure S6. Dose-dependent chemokine/cytokine production**

**Figure S7. Chemokine/cytokine production of different nanoparticles**

**Supplementary Table S1. Detailed list of materials used in the study**

| Reagent                                                                   | Size         | Manufacturer        | Product number |
|---------------------------------------------------------------------------|--------------|---------------------|----------------|
| SM-102                                                                    | 100 mg       | Cayman Chemical     | 33474          |
| COATSOME MC-8080 (DSPC; 1,2-Distearoyl-sn-glycero-3-phosphocholine)       | 1 g          | NOF CORPORATION     | MC-8080        |
| Cholesterol                                                               | 5 g          | Sigma Aldrich       | C8667-5G       |
| DMG-PEG (1,2-dimyristoyl-rac-glycero-3-methoxypolyethylene glycol) 2000   | 1 g          | NOF CORPORATION     | GM-020         |
| Sodium Acetate (CH <sub>3</sub> COONa)                                    | 500 g        | nacalai tesque      | C31118-75      |
| MES (2-( <i>N</i> -morpholino)ethanesulfonic acid)                        | 100 g        | nacalai tesque      | 02442-44       |
| HEPES (4-(2-hydroxyethyl)-1-piperazineethanesulfonic acid)                | 500 g        | Dojindo             | 342-01375      |
| D-PBS (-)                                                                 | 500 mL       | nacalai tesque      | 14249-24       |
| 99.5% Ethanol                                                             | 500 mL       | nacalai tesque      | 14713-95       |
| UltraPure™ DNase/RNase-Free Distilled Water (DDW)                         | 500 mL       | Invitrogen          | 10977-023      |
| Albumin from chicken white egg                                            | 250 mg       | Sigma Aldrich       | A2512-250MG    |
| Polyoxyethylene Sorbitan Monolaurate (Tween 20)                           | 500 g        | nacalai Tesque      | 35624-15       |
| Fetal Bovine Serum (FBS)                                                  | 500 mL       | Gibco               | 10270          |
| Goat anti-Mouse IgG-Fc Fragment Antibody HRP Conjugated                   | 1 mL         | Bethyl Laboratories | A90-131P       |
| TMB Solution                                                              | 100 mL       | Merck Millipore     | CL07-100ML     |
| 1mol/l Sulfuric Acid (H <sub>2</sub> SO <sub>4</sub> )                    | 500 mL       | nacalai Tesque      | 95626-06       |
| Sodium Hydrogen Carbonate (NaHCO <sub>3</sub> )                           | 500 g        | nacalai Tesque      | 31212-25       |
| Sodium Carbonate (Na <sub>2</sub> CO <sub>3</sub> )                       | 500 g        | nacalai Tesque      | 31310-35       |
| LEGENDplex™ Mouse Anti-Virus Response Panel (13-plex) with V-bottom plate | 100 tests    | BioLegend           | 740622         |
| Isoflurane Inhalation Anesthetic Solution                                 | 250 mL       | Viatis              | 1119701G1092   |
| AmiconUltra-4-100K Centrifugal Units                                      | 4 mL volume  | Merck               | UFC810096      |
| AmiconUltra-4-100K Centrifugal Units                                      | 15 mL volume | Merck               | UFC910096      |

## **S2. Methods for supplementary figures**

### **S2-1. Circular dichroism (CD) measurement**

LNP\_A-D were prepared as described in the main text. The final concentration of samples was 6.6 mM of total lipid. Circular dichroism of these samples was measured using a J-1500 Circular Dichroism Spectrophotometer (JASCO Corporation, Japan). Parameters were as follows: measured range = 192-280 nm, scanning ratio = 50 nm/min, response = 4 sec, band width = 1 nm, accumulations = 4 times, and repeat = 3 times. The obtained CD spectrum was normalized by absorbance at 204 nm.

### **S2-2. Chemokine/cytokine measurement**

Dispersed cholesterol particles, Liposome\_C and LNP\_A-D, were administered to BALB/c mice via s.c. injection (back of neck). Six hours after the injection, the blood was collected from the vena cava inferior using a 1 mL syringe and a 26G needle, and it then was moved to a 1.5 mL Eppendorf tube. The blood serum was obtained by incubating the blood at room temperature (RT) for 2 hours, followed by centrifugation (4 °C, 2,000G, 10 min). The chemokine/cytokine quantification was done using a LEGENDplex™ Mouse Anti-Virus Response Panel (13-plex) with a V-bottom Plate kit (#740622, BioLegend, California, US), following the manufacturer's instructions. These data were collected by NovoCyte Flow Cytometer Systems and analyzed using the Data Analysis Software Suite for LEGENDplex™. The chemokine/cytokine levels were determined from the mean fluorescence intensity (MFI) values.

## Supplementary Figure S1

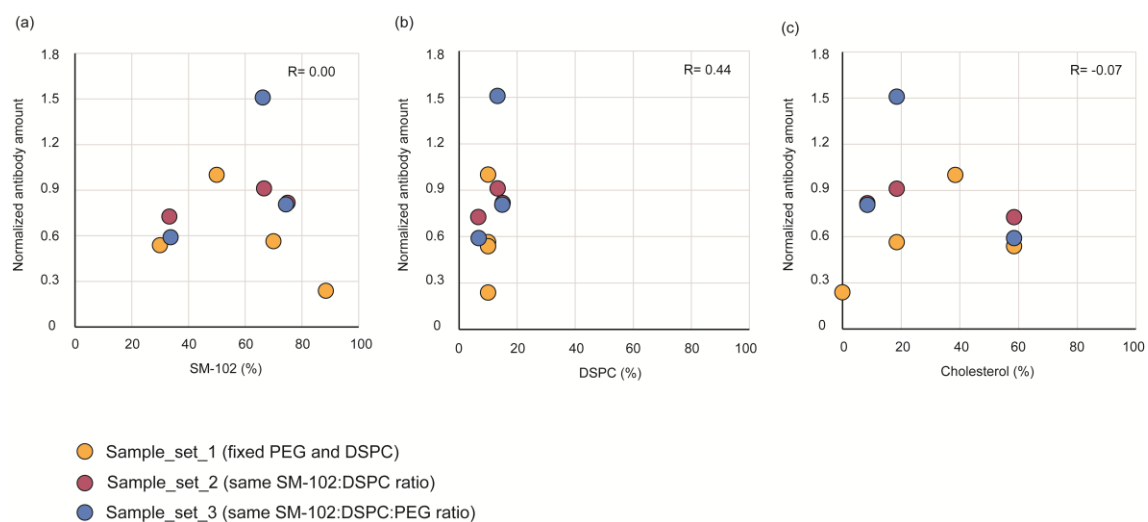

**Figure S1. Correlation of lipid content and antibody production:** Antibody production 14 days after boost vaccination correlated with **(a)** ionizable lipid SM-102, **(b)** DSPC, and **(c)** cholesterol content within the LNP. No significant correlation was found between antibody production and lipid content.

## Supplementary Figure S2

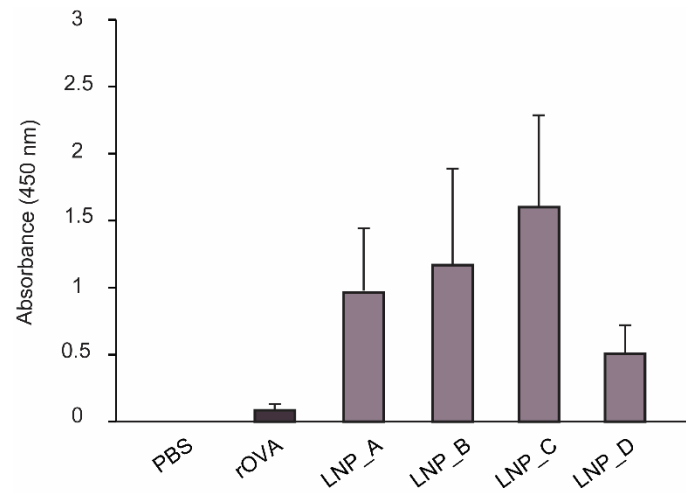

**Figure S2. Antibody production after separate administration of LNPs and antigens:** The antibody production of LNP\_A-D administered separately with recombinant OVA proteins is shown. Doses of 200 nmol of empty-LNPs were administered subcutaneously (s.c.) into BALB/c mice, followed by the administration (s.c.) of 10  $\mu$ g of rOVA 6 hours later. The treatment was performed twice with a 14-day interval. Later, the blood of each mouse was collected, and the serum was used for anti-OVA total IgG quantification by enzyme-linked immunosorbent assay (ELISA). The antibody production of LNPs did not depend on their ionizable lipid content. Mean  $\pm$  SD ( $n = 1-5$ ).

### Supplementary Figure S3

Dispersed cholesterol (98.5% chol)

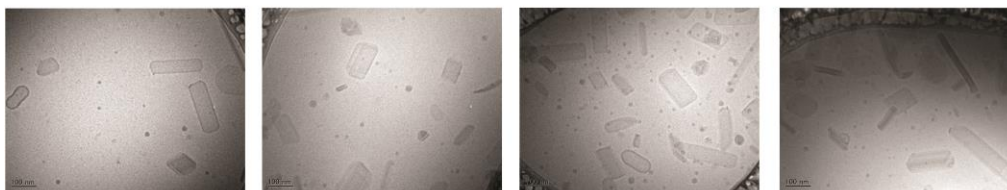

Liposome\_C (38.5% chol)

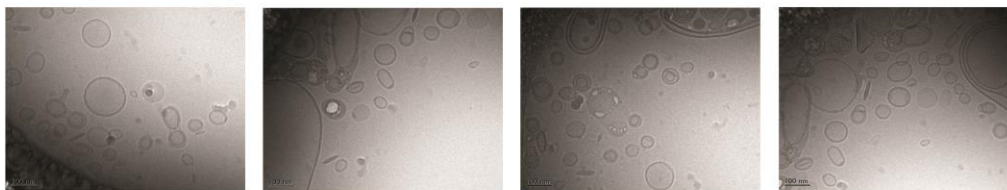

LNP\_A (0% chol)

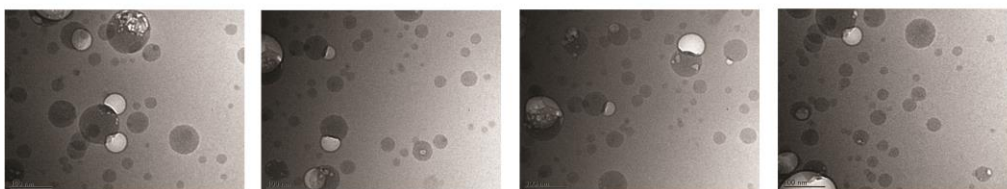

LNP\_B (18.5% chol)

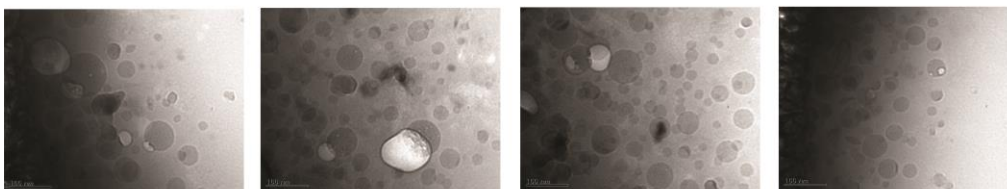

LNP\_C (38.5% chol)

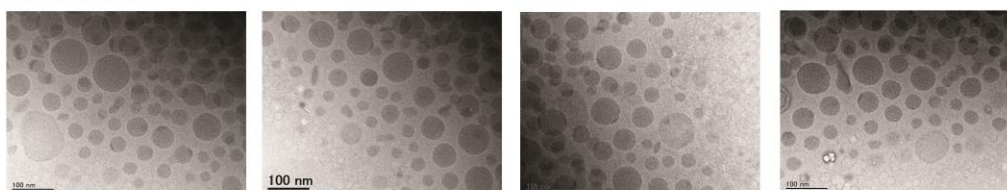

LNP\_D (58.5% chol)

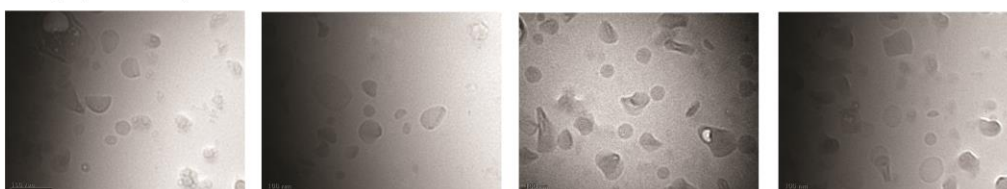

**Figure S3. Additional images of particle morphology observed using Cryo-TEM:** Additional Cryo-TEM images of dispersed cholesterol, Liposome\_C, LNP\_A, LNP\_B, LNP\_C, and LNP\_D are shown. Each bar indicates 100 nm.

## Supplementary Figure S4

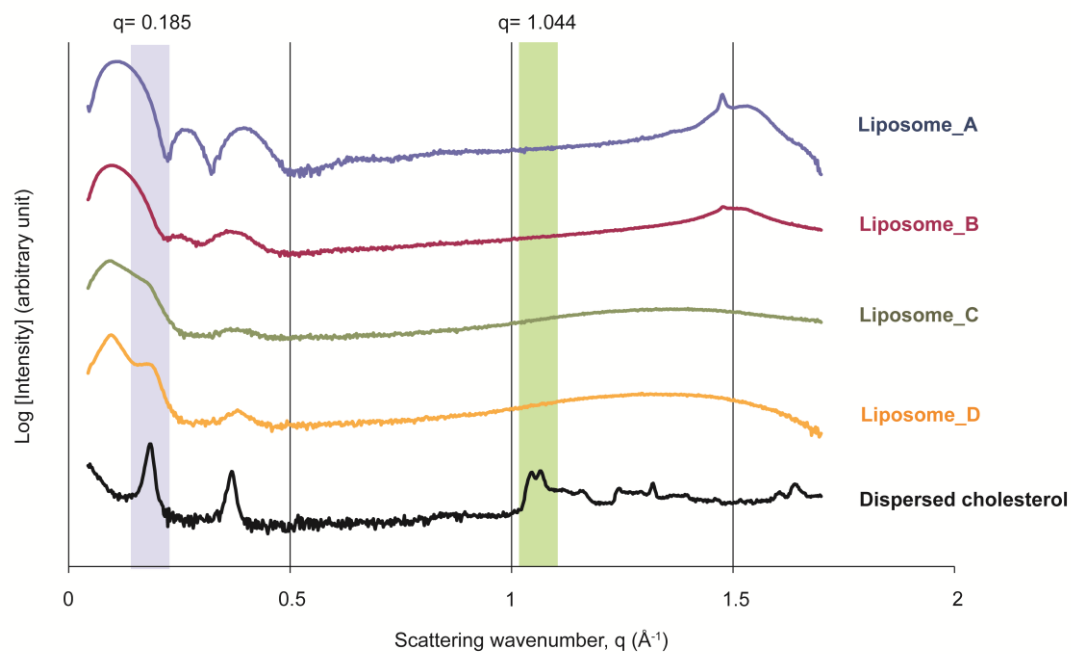

**Figure S4. The SAXS profile of Liposomes\_A-D:** The SAXS profiles of Liposome\_A-D are shown. The SAXS profile of dispersed cholesterol particle is included for comparison.

## Supplementary Figure S5

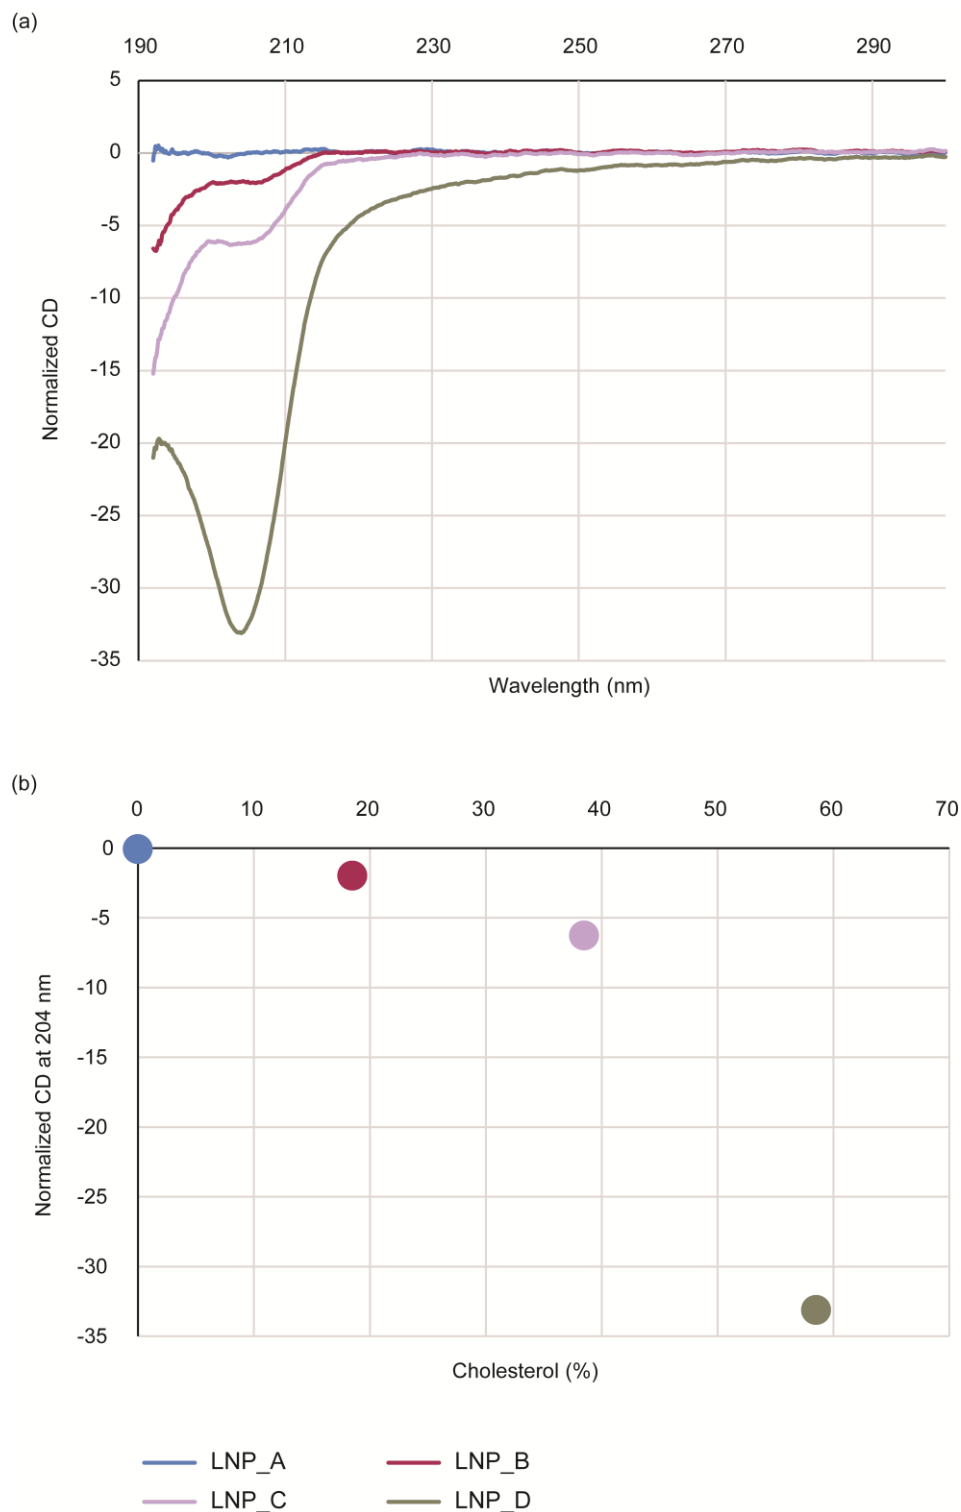

**Figure S5. Circular dichroism (CD) spectra:** (a) The CD spectra of LNP\_A-D normalized at an absorbance wavelength of 204 nm; (b) The CD of LNP\_A-C show a linear relationship with cholesterol content, while that of LNP\_D shows a large absolute value compared with that of the other LNPs.

## Supplementary Figure S6

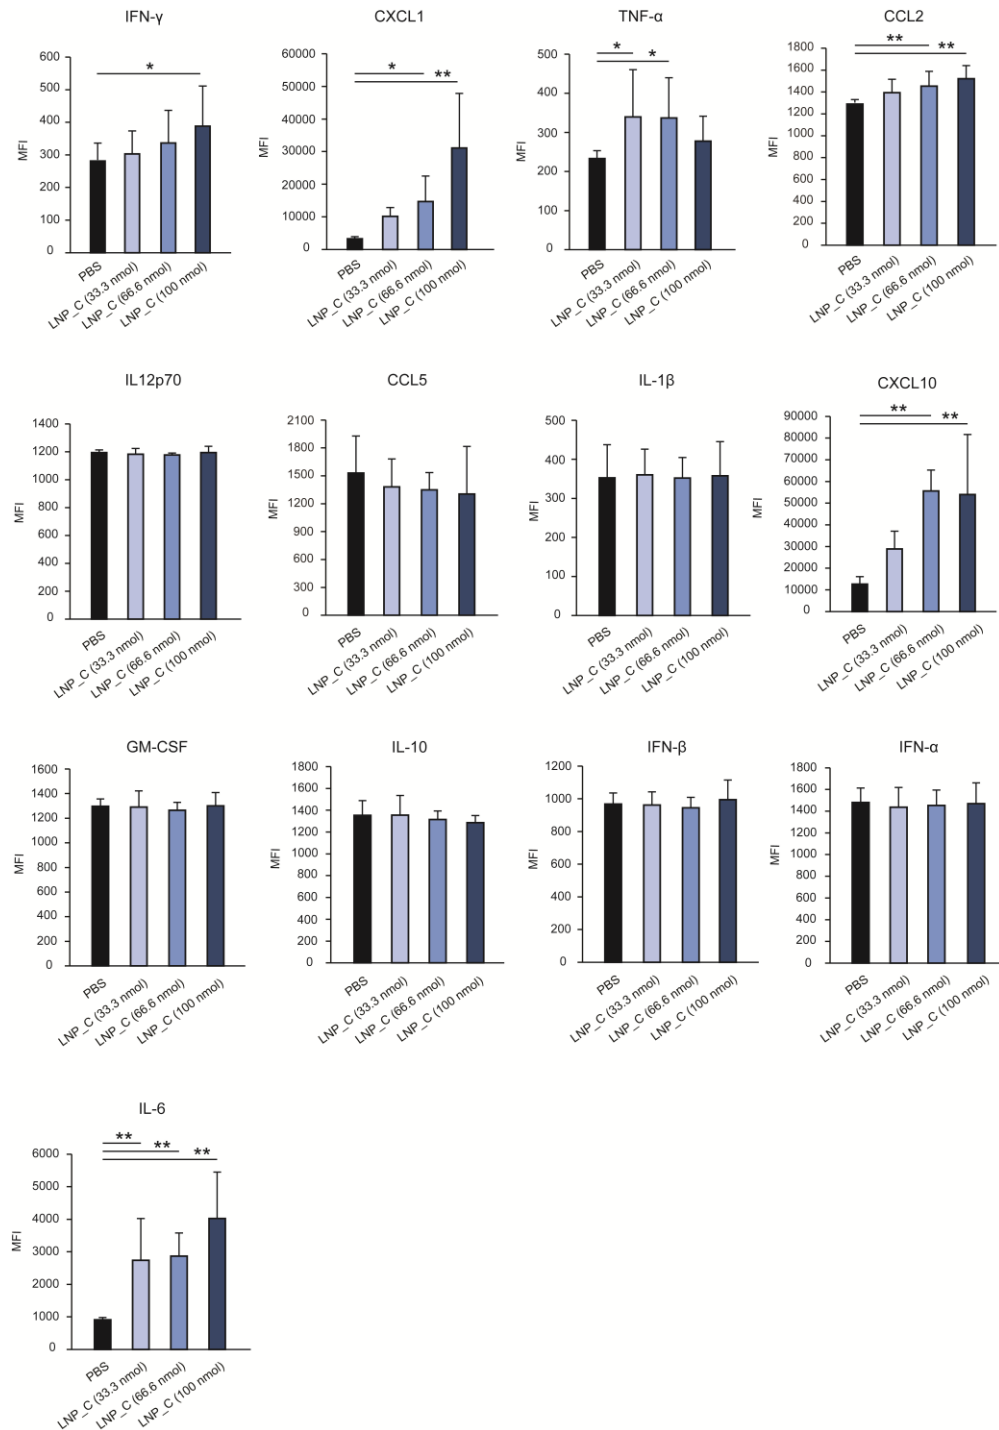

**Figure S6. Dose dependent chemokine/cytokine production:** The chemokines/cytokines induced by LNP\_C are shown with doses of 33.3 nmol, 66.6 nmol, and 100 nmol of total lipid concentration. The respective doses (33.3, 66.6, 100 nmol) of empty-LNPs were administered subcutaneously to the BALB/c mice. After 6 hours, the blood serum was collected and used to quantify the chemokine/cytokine levels. Mean with SD ( $n = 3$ ), \*  $p < 0.05$ , \*\*  $p < 0.01$  (one-way ANOVA followed by Bonferroni against PBS).

## Supplementary Figure S7

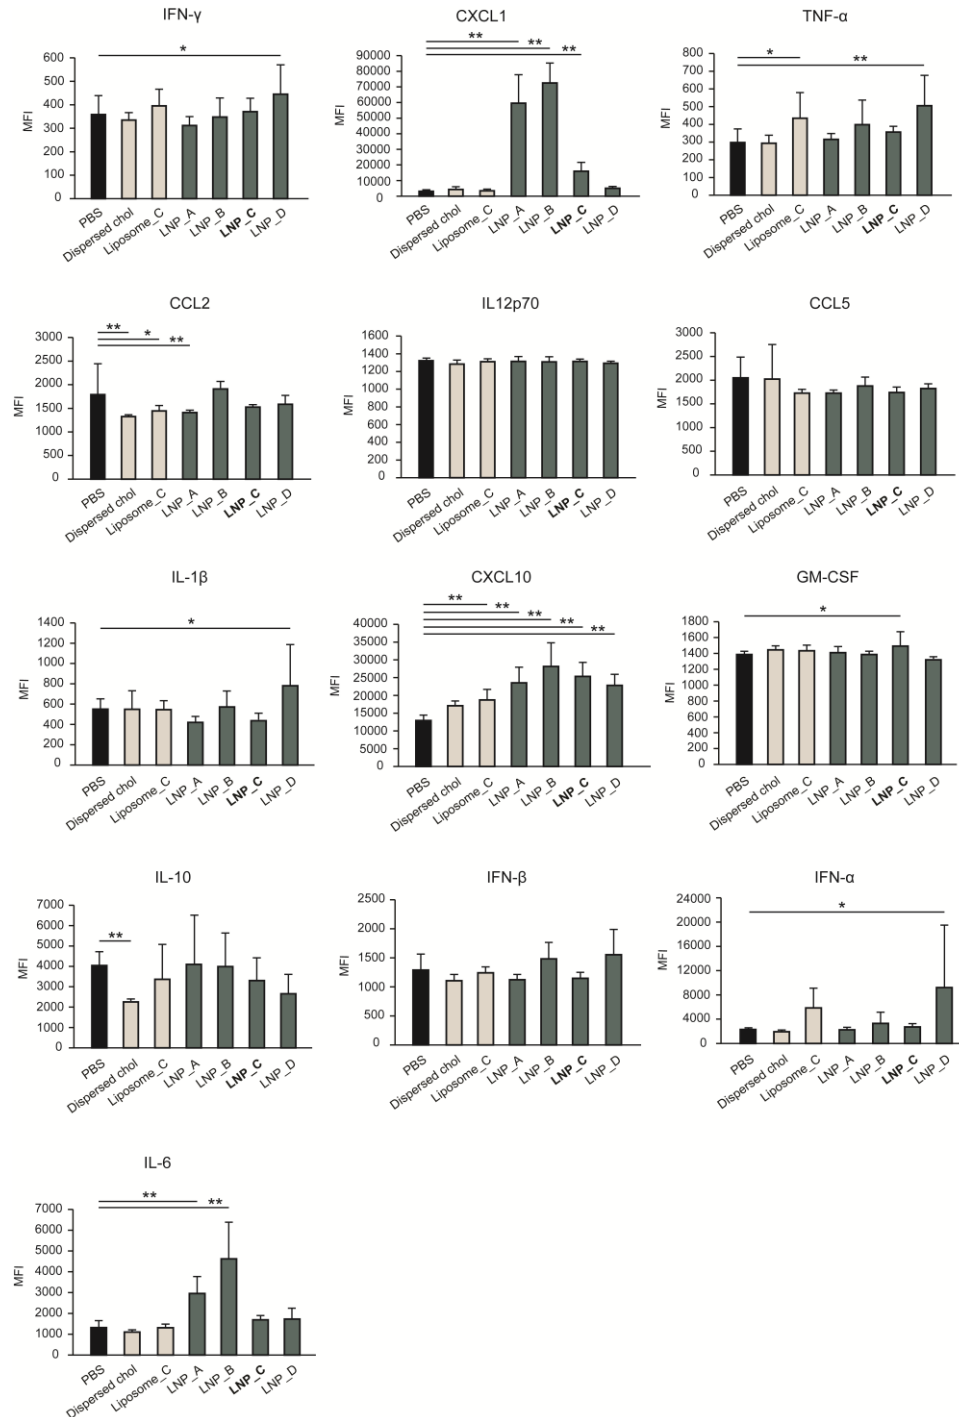

**Figure S7. Chemokines/cytokines production of different nanoparticles:** The chemokines/cytokines induced by dispersed cholesterol, Liposome\_C, and LNP\_A-D are shown. Doses of 100 nmol of empty LNPs were administered subcutaneously to the BALB/c mice; after 6 hours, the blood serum was collected and used to quantify the chemokine/cytokine levels. Mean with SD ( $n = 3$ ), \*  $p < 0.05$ , \*\*  $p < 0.01$  (one-way ANOVA followed by Bonferroni against PBS).
